# Supplementary material for: Cellular context–mediated Akt dynamics regulates MAP kinase signaling thresholds during angiogenesis
Source: PubMed Central journal article supplement — Mol Biol Cell. 2015 Jul 15;26(14):2698–711. doi: 10.1091/mbc.E14-09-1378 (PMC4501366; doi:10.1091/mbc.e14-09-1378), 2015-07-15
Supplement: supp_E14-09-1378v1_CombinedSupMats.pdf [file supp_E14-09-1378v1_CombinedSupMats.pdf]

# Supplemental Materials

*Molecular Biology of the Cell*

Hellesøy et al.

## SUPPLEMENTAL FIGURE 1

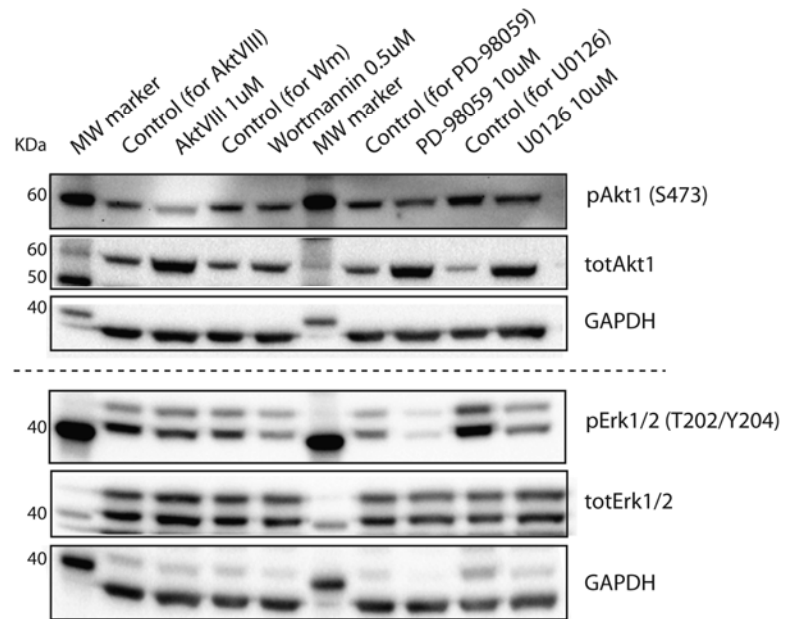

**Supplemental Figure 1. Inhibition of Akt and Erk signaling pathways by chemical inhibitors.** HUVECs were treated with the chemical inhibitors AktVIII (1 $\mu$ M), Wortmannin (0.5  $\mu$ M), PD-98059 (10  $\mu$ M) and U0126 (10  $\mu$ M) for three days. Cells were lysed, and the phosphorylation status of Akt and Erk was assessed by Western blot analysis. GAPDH was used as loading control.

SUPPLEMENTAL FIGURE 2

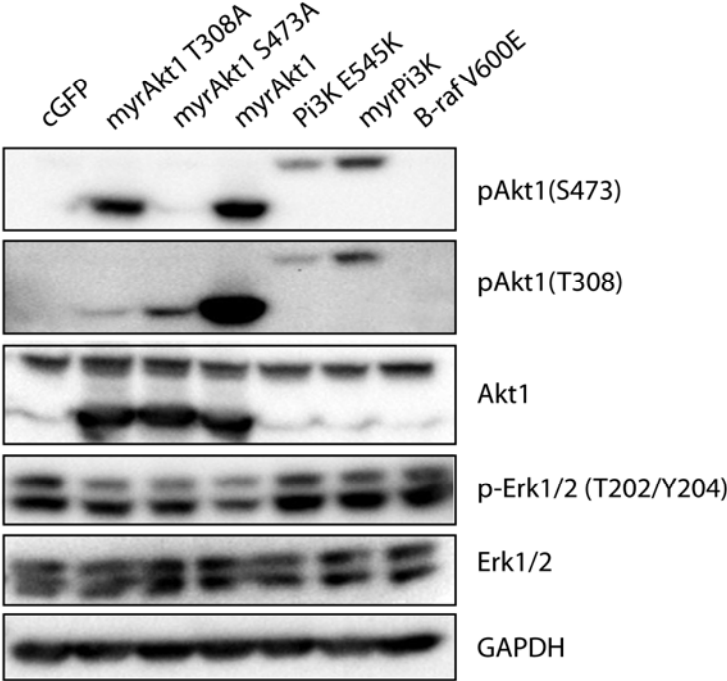

**Supplemental Figure 2. Activation status of Akt and Erk in HUVECs expressing constitutive active Akt- and Erk signaling pathway mutants.** The phosphorylation status of Akt(S473) and Erk1/2(T202/Y204) was assessed by western blot in HUVEC cells stably expressing the constitutively active Akt1 constructs myrAkt1T308A, myrAkt1S473A and myrAkt1, the constitutively active PI3Kinase constructs Pi3K E545K and myrPI3K, and in the constitutively active B-Raf construct B-Raf V600E. HUVECs stably expressing cGFP were used as control.
